# Supplementary material for: Interaction between PNPLA3 I148M Variant and Age at Infection in Determining Fibrosis Progression in Chronic Hepatitis C
Source: PLoS One. 2014 Aug 29;9(8):e106022. doi: 10.1371/journal.pone.0106022 (PMC4149487; doi:10.1371/journal.pone.0106022)
Supplement: Data S1 — Study database. (XLSX) [file pone.0106022.s001.xlsx]

## Sheet: DATABASE_21072014.xls
SEX	DURATION	AGE_ONSET	logFPR	PNPLA3 GG	G3	Fibrosis	STEA Grade	BMI	Gender	route	age at biopsy
1	34	27	-0.8324	no	no	5	1	22	M	EMO	61
0	17	49	-1.2306	no	no	3	1	26	F	EMO	66
0	18	47	-0.9543	no	no	2	1	28	F	EMO	65
0	28	30	-0.845	no	no	4	3	35	F	EMO	58
0	45	0	-1.3526	no	no	2	2	22	F	EMO	45
0	31	27	-0.7924	no	no	5	0	28	F	IVDU	58
1	28	15	-1.4473	no	no	1	1	25	M	EMO	43
1	18	21	-0.4772	no	no	6	2	26	M	EMO	39
1	23	20	-1.0605	no	no	2	1	25	M	EMO	43
0	39	24	-1.5918	no	no	1		25	F	IVDU	63
1	17	23	-0.7533	no	yes	3	3	27	M	EMO	40
0	26	22	-1.4145	no	no	1	2	20	F	IVDU	48
1	17	31	-1.2306	no	no	1	0	25	M	EMO	48
1	20	22	-1.301	no	no	1	1	29	M	EMO	42
0	30	34	-1.4776	no	no		1	24	F	EMO	64
1	47	18	-1.0701	yes	no	5	3	25	M	EMO	65
1	7	23	-0.845	no	no	1	2	24	M	EMO	30
1	29	12	-1.1612	no	no	2	1	26	M	EMO	41
0	37	0	-1.5686	no	yes	1	1	26	F	EMO	37
1	19	19	-0.6767	yes	yes	4	2	28	M	IVDU	38
0	30	26	-1.4776	no	no	1	0	23	F	EMO	56
0	33	30	-0.9165	no	no	4	1	26	F	IVDU	63
0	25	22	-1.0969	no	no	2	1	28	F	EMO	47
0	20	23	-1	no	no	2	1	23	F	IVDU	43
1	19	23	-0.5006	no	no	6	0	25	M	EMO	42
1	35	17	-0.942	no	no	4	1	26	M	EMO	52
0	22	29	-0.6434	yes	no	5	1	26	F	EMO	51
1	13	34	-0.813	no	no	2	0	24	M	IVDU	47
0	34	23	-1.5317	no	no	1	0	21	F	EMO	57
0	20	33	-1.301	no	no	1	3	26	F	EMO	53
0	33	13	-1.2175	no	no	2	0	26	F	EMO	46
1	37	18	-0.7899	no	no	6	1	25	M	EMO	55
0	28	18	-1.1463	no	yes	2	1	22	F	IVDU	46
1	26	19	-0.9378	no	yes	3	3	28	M	IVDU	45
1	23	20	-1.3615	no	no	1	1	24	M	IVDU	43
1	29	10	-0.8604	no	no	4	1	28	M	EMO	39
0	30	24	-1	no	no	3	0	21	F	EMO	54
0	20	45	-0.6021	no	no	5	2	25	F	EMO	65
1	28	24	-1.1463	no	no	2	1	23	M	IVDU	52
0	26	0	-1.4145	no	no	1	0	23	F	EMO	26
1	17	24	-0.7533	no	no	3	0	25	M	EMO	41
1	39	0	-1.2899	no	no	2	2	24	M	EMO	39
1	25	18	-1.3979	no	no	1	0	28	M	IVDU	43
1	36	6	-0.8573	no	no	5	0	30	M	EMO	42
1	20	24	-0.5229	no	yes	6	1	25	M	EMO	44
1	17	19	-0.7533	no	no	3	1	23	M	EMO	36
0	29	31	-1.1612	no	no	2	0	26	F	EMO	60
0	35	22	-1.067	no	no	3	2	23	F	EMO	57
0	42	0	-1.6819	no	no	0	1	26	F	EMO	42
1	12	53	-0.4772	yes	no	4	2	20	M	IVDU	65
0	20	19	-1	no	yes	2	2	26	F	EMO	39
1	43	0	-1.6326	no	no	1	0	25	M	EMO	43
1	42	0	-1.3224	no	no	2	1	24	M	EMO	42
1	24	18	-1.3799	no	no	1	0	25	M	IVDU	42
0	30	3	-1	no	no	3	0	22	F	EMO	33
1	24	20	-1.0794	no	yes	1	1	25	M	EMO	44
1	16	22	-0.9031	no	no	2	0	26	M	EMO	38
0	17	37	-0.5315	no	no	5	0	23	F	IVDU	54
0	22	28	-1.0414	no	no	2	0	24	F	IVDU	50
1	29	18	-0.6842	no	yes	6	3	25	M	EMO	47
1	42	0	-0.845	no	no	6	0	26	M	EMO	42
1	19	18	-0.9776	no	no	2	1	26	M	IVDU	37
0	36	7	-1.2549	no	no	2	0	27	F	EMO	43
1	20	33	-0.8239	no	no	3	1	25	M	EMO	53
0	18	30	-0.4772	no	no	6	2	22	F	EMO	48
0	26	33	-0.6368	no	no	6	2	23	F	EMO	59
1	11	17	-1.0414	no	no	1		23	M	EMO	28
1	35	20	-1.2434	yes	no	2		22	M	IVDU	55
1	17	22	-1.2306	no	no	1	0	24	M	IVDU	39
1	24	16	-0.6021	no	no	6	3	25	M	IVDU	40
0	24	40	-1.0794	no	no	2	0	27	F	EMO	64
1	12	39	-0.4772	yes	no	4	2	26	M	EMO	51
1	35	17	-1.067	no	yes	3		25	M	EMO	52
0	27	21	-1.4318	no	no	1	2	18	F	EMO	48
1	35	14	-1.5436	no	no	1	1	28	M	other	49
0	16	43	-0.9031	no	no	2	0	26	F	EMO	59
0	14	48	-0.669	yes	no	3	2	35	F	EMO	62
0	30	32	-0.699	yes	no	6		26	F	EMO	62
0	19	24	-0.9776	no	yes	2	2	27	F	EMO	43
0	29	0	-1.4622	no	no	1	1	26	F	EMO	29
1	43	7	-1.6326	no	no	5	2	26	M	EMO	50
0	31	15	-0.7133	no	no	6	2	25	F	EMO	46
1	6	56	-0.1761	no	no	4	1	27	M	EMO	62
1	6	50	-0.7781	yes	no	1	1	28	M	EMO	56
1	20	36	-1	no	no	2	1	29	M	IVDU	56
1	16	29	-0.5051	no	yes	5	1	24	M	EMO	45
0	27	30	-0.7324	no	no	5	1	27	F	EMO	57
1	38	14	-0.9776	no	no	4	1	27	M	IVDU	52
1	40	24	-0.8239	no	no	6	3	29	M	EMO	64
0	30	37	-1.1759	no	no	2		24	F	EMO	67
0	33	29	-1.2175	no	no	2	1	26	F	EMO	62
1	24	19	-1.0794	no	yes	2	2	21	M	IVDU	43
0	13	12	-1.1141	no	no	1	0	21	F	EMO	25
1	32	17	-1.5045	no	no	1	1	22	M	EMO	49
0	35	21	-1.6819	no	no	0	0	28	F	EMO	56
1	21	40	-1.0214	no	no	2	1	26	M	EMO	61
1	44	3	-0.8652	no	no	6	1	26	M	EMO	47
0	38	12	-1.1029	yes	no	3	1	28	F	EMO	50
0	30	32	-1.1759	no	no	2	0	22	F	EMO	62
1	32	0	-1.5045	no	no	1	3	27	M	EMO	32
1	27	20	-1.1302	no	no	2	3	28	M	EMO	47
1	7	52	-0.5441	no	no	2	0	29	M	EMO	59
0	32	0	-1.5045	no	no	1	0	28	F	EMO	32
0	28	8	-1.1463	no	no	2	0	18	F	EMO	36
1	20	31	-1.301	no	no	1	0	26	M	IVDU	51
1	17	22	-1.2306	no	no	1	0	24	M	IVDU	39
1	12	22	-0.6021	no	yes	3	1	26	M	IVDU	34
1	13	0	-0.3358	no	no	6	1	26	M	other	13
1	18	20	-1.2549	yes	no	1	0	27	M	IVDU	38
1	39	0	-1.5918	no	no	1	1	26	M	EMO	39
1	10	28	-1	no	no	1	1	24	M	EMO	38
0	38	26	-1.58	no	no	1	0	22	F	EMO	64
1	28	0	-1.4473	no	no	1	1	25	M	EMO	28
1	10	59	-0.3979	no	no	4	0	22	M	EMO	69
1	34	30	-0.8324	no	no	5	3	25	M	EMO	64
0	17	19	-0.9296	no	no			29	F	EMO	36
0	50	0	-0.9208	no	no	6	1	31	F	EMO	50
0	19	25	-0.9776	no	yes	2	3	29	F	other	44
0	19	17	-0.5006	no	no	6	1	30	F	IVDU	36
1	28	18	-0.9702	no	yes	3	3	28	M	IVDU	46
0	16	12	-1.2041	no	no	1	0	28	F	EMO	28
1	20	19	-1.301	no	no	2	0	23	M	EMO	39
1	29	23	-0.7635	no	no	5	2	25	M	EMO	52
0	25	0	-1.3979	no	no	1	0	20	F	EMO	25
1	36	0	-1.2549	no	no	2	1	24	M	EMO	36
0	19	30	-0.9776	yes	no	2	0	26	F	EMO	49
0	40	0	-1.6021	no	no	1	0	27	F	EMO	40
0	21	31	-1.3224	no	no	1	1	28	F	EMO	52
0	31	25	-0.8894	no	no	4	1	25	F	EMO	56
0	39	25	-0.9889	no	no	6	3	22	F	EMO	64
1	14	26	-0.845	no	no	2	0	24	M	IVDU	40
1	9	27	-0.9543	no	no	1	0	28	M	IVDU	36
1	7	19	-0.5441	no	yes	2	1	24	M	EMO	26
0	18	22	-1.2549	no	no	1	0	26	F	IVDU	40
0	25	30	-1.3979	no	no	1	0	22	F	EMO	55
0	44	9	-1.1662	no	no	3	0	24	F	EMO	53
0	52	12	-1.4145	no	no	2	0	26	F	EMO	64
1	11	49	-0.3425	no	no	5	0	23	M	IVDU	60
1	39	0	-1.5918	no	no	1	0	28	M	IVDU	39
1	20	37	-1	no	no	2	0	33	M	IVDU	57
1	32	17	-1.5045	no	no	1	0	25	M	EMO	49
1	30	15	-1	no	no	3	0	26	M	IVDU	45
1	10	23	-0.5229	no	yes	3	1	24	M	EMO	33
0	19	31	-0.9776	no	no	2	0	28	F	EMO	50
1	6	22	-0.4772	no	yes	2	1	22	M	EMO	28
1	29	26	-1.4622	no	no	1	0	25	M	IVDU	55
0	48	3	-1.6819	yes	no	1	1	26	F	EMO	51
1	38	0	-1.279	no	no	2	1	30	M	EMO	38
0	16	17	-1.2041	no	no	1	0	28	F	EMO	33
1	18	20	-0.9543	no	no	2	0	24	M	IVDU	38
1	19	20	-0.9776	no	no	2	2	24	M	EMO	39
0	11	0	-1.0414	yes	no	1	0	23	F	EMO	11
0	22	36	-1.342	no	no	1	1	26	F	EMO	58
1	23	9	-1.3615	yes	no	1	1	22	M	EMO	32
1	18	18	-0.4772	no	yes	6	1	26	M	IVDU	36
1	24	18	-1.0794	no	no	2	1	29	M	IVDU	42
0	30	13	-1.1759	yes	no	2	1	4	F	EMO	43
0	17	32	-0.9296	no	no	2	0	25	F	EMO	49
0	36	18	-1.556	no	no	1	0	22	F	EMO	54
1	36	0	-0.7781	no	no	6	2	25	M	EMO	36
0	35	24	-0.766	no	no	6	0	26	F	EMO	59
0	13	18	-0.813	no	yes	2	0	24	F	EMO	31
1	33	11	-0.7404	yes	yes	6	1	27	M	EMO	44
1	35	0	-1.5436	no	no	1	0	26	M	IVDU	35
1	24	22	-0.9031	no	no	3	2	23	M	EMO	46
0	27	39	-0.8294	no	no	4	1	28	F	EMO	66
0	22	43	-1.0414	no	no	2	0	26	F	EMO	65
1	47	20	-1.0701	no	no	4	0	27	M	EMO	67
0	21	38	-1.0214	no	no	2	1	22	F	other	59
0	24	21	-0.6021	no	no	6	1	27	F	EMO	45
1	7	42	-0.845	no	no	1	1	27	M	EMO	49
1	18	19	-0.9543	no	no	2	1	27	M	EMO	37
1	17	23	-0.5315	no	no	5	1	28	M	EMO	40
1	37	4	-1.5686	no	no	1	1	29	M	EMO	41
1	22	21	-1.342	no	no	1	0	30	M	EMO	43
1	13	20	-1.1141	no	no	1	0	22	M	IVDU	33
0	35	28	-1.5436	no	no	1	0	27	F	EMO	63
1	42	23	-1.3224	no	no	2	1	26	M	EMO	65
1	9	35	-0.6533	no	no	2	0	23	M	EMO	44
0	27	20	-0.9543	no	yes	3		30	F	EMO	47
0	22	42	-0.7404	no	yes	4	3	27	F	IVDU	64
0	49	11	-1.2132	no	no	3	1	27	F	EMO	60
0	23	38	-0.6627	no	no	5	1	22	F	IVDU	61
0	25	18	-1.3979	no	yes	1	3	25	F	EMO	43
0	8	52	-0.6021	no	no	2	1	19	F	EMO	60
0	30	18	-1.1759	no	no	2	0	21	F	EMO	48
0	19	0	-1.279	no	no	1	0	22	F	IVDU	19
1	17	47	-0.9296	no	no	2	0	20	M	EMO	64
0	18	5	-0.9543	no	no	2	0	31	F	EMO	23
1	27	13	-1.1302	no	no	2	1	30	M	EMO	40
0	30	29	-1.1759	no	no	2	0	25	F	EMO	59
1	7	53	-0.3679	no	no	3		23	M	EMO	60
1	53	0	-1.4237	no	no		1	27	M	EMO	53
0	12	33	-1.0794	no	no	1	0	28	F	EMO	45
0	31	41	-0.7133	no	no	6	0	22	F	EMO	72
1	39	13	-1.2899	yes	no	2	0	25	M	EMO	52
0	30	24	-0.7781	no	no	5		24	F	EMO	54
0	34	22	-1.5317	no	no	1		30	F	EMO	56
0	10	44	-0.699	no	no	1	2	26	F	EMO	54
0	22	31	-1.0414	no	no	2	0	21	F	EMO	53
0	17	41	-0.7533	no	no	3	1	22	F	EMO	58
0	43	0	-1.0315	no	no	4	1	25	F	IVDU	43
1	29	18	-0.8604	no	yes	4	1	24	M	EMO	47
0	43	7	-1.3325	no	yes	2	3	22	F	EMO	50
0	7	14	-0.5441	no	no	2	0	26	F	IVDU	21
0	27	16	-0.9543	no	yes	3	1	22	F	EMO	43
0	7	21	-0.845	no	no	1	0	21	F	IVDU	28
0	32	25	-1.2041	no	no	2	1	26	F	EMO	57
1	23	20	-1.3615	no	no	1	1	24	M	EMO	43
1	8	51	-0.9031	no	no	1	1	22	M	IVDU	59
0	25	29	-0.7959	no	no	4	0	25	F	EMO	54
1	16	20	-1.2041	no	no	1	0	26	M	IVDU	36
1	38	16	-1.279	no	yes	2	2	26	M	EMO	54
1	14	17	-1.1463	no	yes	1	2	27	M	IVDU	31
1	27	28	-0.9543	no	no	3	2	26	M	EMO	55
0	25	8	-1.0969	no	yes	2	2	25	F	EMO	33
1	11	29	-1.0414	no	no	1	0	22	M	IVDU	40
0	41	0	-1.1355	yes	no	3	0	28	F	IVDU	41
0	28	18	-1.4473	no	yes	1	1	20	F	EMO	46
1	21	16	-0.6232	no	no	5	1	25	M	EMO	37
0	36	0	-1.556	no	no	2	0	28	F	IVDU	36
1	38	11	-1.58	no	no	2	0	26	M	EMO	49
1	25	23	-1.3979	no	no	1	0	21	M	EMO	48
0	29	28	-0.9855	no	no		0	26	F	EMO	57
0	16	19	-1.2041	no	no	1		31	F	EMO	35
0	41	19	-0.9136	no	no	5	0	30	F	EMO	60
1	50	12	-1.3979	yes	no	2	0	25	M	EMO	62
1	5	41	-0.3979	no	no	2	1	25	M	EMO	46
1	20	20	-1	no	no	4	1	22	M	EMO	40
1	25	28	-0.9208	no	no		1	22	M	EMO	53
0	40	15	-1.1249	no	no	3		26	F	EMO	55
0	21	35	-0.6232	no	no	5	0	24	F	EMO	56
1	23	15	-1.0605	no	no	2	1	24	M	EMO	38
1	4	20	-0.6021	no	yes	1	3	20	M	EMO	24
1	15	24	-0.4772	yes	no	5	1	27	M	EMO	39
1	23	18	-1.0605	no	no	2	0	28	M	IVDU	41
0	27	15	-1.1302	no	no	2	0	22	F	EMO	42
1	20	22	-0.8239	no	no	3	1	22	M	EMO	42
1	16	20	-1.2041	no	no	1		28	M	IVDU	36
1	38	27	-1.1029	no	no	3	1	28	M	IVDU	65
0	18	32	-0.6533	no	no	4	3	31	F	EMO	50
1	17	17	-0.9296	no	no	2	1	24	M	EMO	34
0	47	0	-1.1952	no	no	3	0	28	F	EMO	47
0	25	33	-1.0969	no	no	2	1	26	F	EMO	58
0	20	29	-1	no	no	2	1	28	F	EMO	49
1	21	23	-1.0214	no	yes	2	1	22	M	EMO	44
0	22	6	-1.0414	no	no	2	0	26	F	IVDU	28
